# Supplementary material for: Effectiveness of training in evidence-based medicine skills for healthcare professionals: a systematic review
Source: PubMed Central journal article supplement (PMC4820973; doi:10.1186/s12909-016-0616-2), 2016-04-04
Supplement: 12909_2016_616_MOESM1_ESM.pdf [file 12909_2016_616_MOESM1_ESM.pdf]

Additional file 1: Table S1: Effects of the interventions

| Reference     | Outcomes                     | Tools                                                                                                                                                                                                                                                                                                                                                                                                             | Results             |                      |                                               |               |         |
|---------------|------------------------------|-------------------------------------------------------------------------------------------------------------------------------------------------------------------------------------------------------------------------------------------------------------------------------------------------------------------------------------------------------------------------------------------------------------------|---------------------|----------------------|-----------------------------------------------|---------------|---------|
| Bennet et al. | 1. Attitudes<br>2. Knowledge | 1.<br>5-point Likert scale (1 = 'strongly disagree' and 5 = 'strongly agree') level of agreement with six statements regarding evidence-based practice (range 6 to 30)<br><br>2.<br>3 possible responses ('agree', 'don't know' or disagree') agreement with five statements about evidence-based practice. Items answered incorrectly or with 'don't know' scored 0, a correct response scored 2 (range 0 to 10) | <u>1.</u>           |                      |                                               |               |         |
|               |                              |                                                                                                                                                                                                                                                                                                                                                                                                                   | Pre-mean score (SD) | Post-mean score (SD) | Change between pre- and post scores Mean (SD) | 95% CI        | p-value |
|               |                              |                                                                                                                                                                                                                                                                                                                                                                                                                   | 19.80 (2.01)        | 20.02 (1.99)         | 0.22 (2.85)                                   | (-0.96, 0.52) | 0.56    |
|               |                              |                                                                                                                                                                                                                                                                                                                                                                                                                   | <u>2.</u>           |                      |                                               |               |         |
|               |                              |                                                                                                                                                                                                                                                                                                                                                                                                                   | Pre-mean score (SD) | Post-mean score (SD) | Change between pre- and post scores Mean (SD) | 95% CI        | p-value |
|               |                              |                                                                                                                                                                                                                                                                                                                                                                                                                   | 4.14 (2.37)         | 7.69 (2.31)          | 3.56 (2.81)                                   | (2.83, 4.29)  | < 0.001 |
| Kim et al.    | Attitudes                    | Evidence-based Practice Questionnaire (EBPQ) by Upton and Upton: subscale attitude                                                                                                                                                                                                                                                                                                                                | Pre-test mean (SEM) | Post-test mean (SEM) | Mean differences                              | p-value       |         |
|               |                              |                                                                                                                                                                                                                                                                                                                                                                                                                   | 5.60 (0.09)         | 5.75 (0.10)          | 0.16                                          | 0.198         |         |

|                   |                                               |                                                                                                               |                  |                            |                             |                                    |
|-------------------|-----------------------------------------------|---------------------------------------------------------------------------------------------------------------|------------------|----------------------------|-----------------------------|------------------------------------|
| Liza-rondo et al. | 1. Knowledge<br>2. Attitudes<br>3. EBP uptake | 1.<br>Adapted Fresno Test (AFT)<br>2. + 3.<br>Evidence-based Practice Questionnaire (EBPQ) by Upton and Upton | Speech Pathology |                            |                             |                                    |
|                   |                                               |                                                                                                               |                  | Pre-test Score<br>Mean ±SD | Post-test Score<br>Mean ±SD | Mean Percentage Change<br>(95% CI) |
|                   |                                               |                                                                                                               | Knowledge        | 25.30 ± 11.94              | 53.80 ± 23.08               | 134.36 (54.80 – 213.82)*           |
|                   |                                               |                                                                                                               | Attitude         | 22.50 ± 1.84               | 23.00 ± 2.11                | 2.65 (-4.16 – 9.41)                |
|                   |                                               |                                                                                                               | EBP Uptake       | 26.20 ± 8.93               | 32.00 ± 6.41                | 42.30 (-4.76 – 89.41)              |
|                   |                                               |                                                                                                               | Physiotherapy    |                            |                             |                                    |
|                   |                                               |                                                                                                               |                  | Pre-test Score<br>Mean ±SD | Post-test Score<br>Mean ±SD | Mean Percentage Change<br>(95% CI) |
|                   |                                               |                                                                                                               | Knowledge        | 32.26 ± 14.65              | 79.52 ± 18.70               | 245.90 (110.65 – 381.23)*          |
|                   |                                               |                                                                                                               | Attitude         | 19.50 ± 3.47               | 21.89 ± 4.46                | 15.85 (6.54 – 25.26)*              |
|                   |                                               |                                                                                                               | EBP Uptake       | 18.89 ± 6.66               | 26.57 ± 8.12                | 71.06 (12.24 – 129.88)*            |
|                   |                                               |                                                                                                               | Social Work      |                            |                             |                                    |
|                   |                                               |                                                                                                               |                  | Pre-test Score<br>Mean ±SD | Post-test Score<br>Mean ±SD | Mean Percentage Change<br>(95% CI) |
|                   |                                               |                                                                                                               | Knowledge        | 24.19 ± 9.87               | 43.06 ± 14.82               | 141.20 (24.09 – 258.34)*           |

|            |              |              |                       |
|------------|--------------|--------------|-----------------------|
| Attitude   | 19.56 ± 3.37 | 20.81 ± 3.23 | 8.04 (-0.29 – 16.39)  |
| EBP Uptake | 22.56 ± 8.14 | 26.00 ± 5.49 | 28.25 (4.73 – 51.77)* |

Occupational Therapy

|            | Pre-test Score<br>Mean ±SD | Post-test Score<br>Mean ±SD | Mean Percentage Change<br>(95% CI) |
|------------|----------------------------|-----------------------------|------------------------------------|
| Knowledge  | 22.75 ± 10.87              | 55.58 ± 22.66               | 198.50 (135.71 – 261.34)*          |
| Attitude   | 21.31 ± 3.13               | 21.75 ± 3.69                | 2.73 (-1.98 – 7.46)                |
| EBP Uptake | 21.56 ± 7.92               | 22.50 ± 8.28                | 16.52 (-5.86 – 38.92)              |

Dietetics / Nutrition

|            | Pre-test Score<br>Mean ±SD | Post-test Score<br>Mean ±SD | Mean Percentage Change<br>(95% CI) |
|------------|----------------------------|-----------------------------|------------------------------------|
| Knowledge  | 31.75 ± 9.80               | 59.08 ± 22.63               | 87.81 (50.73 – 124.93)*            |
| Attitude   | 21.17 ± 3.16               | 21.00 ± 3.38                | 0.20 (-8.34 – 8.75)                |
| EBP Uptake | 18.92 ± 8.08               | 23.58 ± 7.22                | 39.18 (8.56 – 69.78)*              |

\* Significant at 0.05

|                              |           |                           |                                                           |                         |                          |                             |
|------------------------------|-----------|---------------------------|-----------------------------------------------------------|-------------------------|--------------------------|-----------------------------|
| Mc Cluskey et al.            | Knowledge | Adapted Fresno Test (AFT) | 1. AFT total scores (means, SD)                           |                         |                          |                             |
|                              |           |                           |                                                           | Pre-Workshop<br>(n=114) | Post-Workshop<br>(n=106) | 8-month Follow-up<br>(n=51) |
|                              |           |                           | Total score (0 to 156)                                    | 57.1 (±26.7)            | 78.3 (±18.6)             | 82.2 (±24.5)                |
| AFT scores, mean differences |           |                           |                                                           |                         |                          |                             |
|                              |           |                           |                                                           | Mean Diff               | 95% CI                   | p-value                     |
|                              |           |                           | Pre- to Post-Workshop<br>Total score (0-156)              | 20.6                    | 15.6 – 25.5              | 0.0001                      |
|                              |           |                           | Post-Workshop to 8-month Follow-up<br>Total score (0-156) | 1.2                     | -6.0 – 8.5               | 0.734                       |
|                              |           |                           | Pre-Workshop to 8-month Follow-up<br>Total score (0-156)  | 23.1                    | 14.7 – 31.6              | 0.0001                      |

| Meyer et al.              | Knowledge and Skills                     | Multiple choice test (13 items on three subscales)                                                                                                                                                                                          | <table border="1" data-bbox="570 659 1523 806"> <thead> <tr> <th>Total score (maximum)</th> <th>Before test Means (SD)</th> <th>After test Means (SD)</th> <th>Difference Means (SD)</th> </tr> </thead> <tbody> <tr> <td>Total (13.5)</td> <td>4.6 (±1.9)</td> <td>6.8 (±1.8)</td> <td>2.2* (±2.1)</td> </tr> </tbody> </table><br><table border="1" data-bbox="570 852 1523 1094"> <thead> <tr> <th>Subscales score (maximum)</th> <th>Before test Means (SD)</th> <th>After test Means (SD)</th> <th>Difference Means (SD)</th> </tr> </thead> <tbody> <tr> <td>Study characteristics (5)</td> <td>1.9 (±1.1)</td> <td>2.7 (±1.2)</td> <td>0.8* (±1.3)</td> </tr> <tr> <td>Computation (3)</td> <td>2.3 (±0.9)</td> <td>2.7 (±0.5)</td> <td>0.4* (±1.0)</td> </tr> <tr> <td>Communication (5.5)</td> <td>0.4 (±0.6)</td> <td>1.4 (±1.0)</td> <td>1.0* (±1.2)</td> </tr> </tbody> </table> <p data-bbox="570 1094 743 1121">*Significant at 0.05</p> |  |  |  | Total score (maximum)  | Before test Means (SD) | After test Means (SD) | Difference Means (SD) | Total (13.5)  | 4.6 (±1.9) | 6.8 (±1.8)             | 2.2* (±2.1)           | Subscales score (maximum) | Before test Means (SD) | After test Means (SD) | Difference Means (SD) | Study characteristics (5) | 1.9 (±1.1) | 2.7 (±1.2) | 0.8* (±1.3) | Computation (3) | 2.3 (±0.9) | 2.7 (±0.5) | 0.4* (±1.0) | Communication (5.5) | 0.4 (±0.6) | 1.4 (±1.0) | 1.0* (±1.2) |
|---------------------------|------------------------------------------|---------------------------------------------------------------------------------------------------------------------------------------------------------------------------------------------------------------------------------------------|--------------------------------------------------------------------------------------------------------------------------------------------------------------------------------------------------------------------------------------------------------------------------------------------------------------------------------------------------------------------------------------------------------------------------------------------------------------------------------------------------------------------------------------------------------------------------------------------------------------------------------------------------------------------------------------------------------------------------------------------------------------------------------------------------------------------------------------------------------------------------------------------------------------------------------------------------------|--|--|--|------------------------|------------------------|-----------------------|-----------------------|---------------|------------|------------------------|-----------------------|---------------------------|------------------------|-----------------------|-----------------------|---------------------------|------------|------------|-------------|-----------------|------------|------------|-------------|---------------------|------------|------------|-------------|
| Total score (maximum)     | Before test Means (SD)                   | After test Means (SD)                                                                                                                                                                                                                       | Difference Means (SD)                                                                                                                                                                                                                                                                                                                                                                                                                                                                                                                                                                                                                                                                                                                                                                                                                                                                                                                                  |  |  |  |                        |                        |                       |                       |               |            |                        |                       |                           |                        |                       |                       |                           |            |            |             |                 |            |            |             |                     |            |            |             |
| Total (13.5)              | 4.6 (±1.9)                               | 6.8 (±1.8)                                                                                                                                                                                                                                  | 2.2* (±2.1)                                                                                                                                                                                                                                                                                                                                                                                                                                                                                                                                                                                                                                                                                                                                                                                                                                                                                                                                            |  |  |  |                        |                        |                       |                       |               |            |                        |                       |                           |                        |                       |                       |                           |            |            |             |                 |            |            |             |                     |            |            |             |
| Subscales score (maximum) | Before test Means (SD)                   | After test Means (SD)                                                                                                                                                                                                                       | Difference Means (SD)                                                                                                                                                                                                                                                                                                                                                                                                                                                                                                                                                                                                                                                                                                                                                                                                                                                                                                                                  |  |  |  |                        |                        |                       |                       |               |            |                        |                       |                           |                        |                       |                       |                           |            |            |             |                 |            |            |             |                     |            |            |             |
| Study characteristics (5) | 1.9 (±1.1)                               | 2.7 (±1.2)                                                                                                                                                                                                                                  | 0.8* (±1.3)                                                                                                                                                                                                                                                                                                                                                                                                                                                                                                                                                                                                                                                                                                                                                                                                                                                                                                                                            |  |  |  |                        |                        |                       |                       |               |            |                        |                       |                           |                        |                       |                       |                           |            |            |             |                 |            |            |             |                     |            |            |             |
| Computation (3)           | 2.3 (±0.9)                               | 2.7 (±0.5)                                                                                                                                                                                                                                  | 0.4* (±1.0)                                                                                                                                                                                                                                                                                                                                                                                                                                                                                                                                                                                                                                                                                                                                                                                                                                                                                                                                            |  |  |  |                        |                        |                       |                       |               |            |                        |                       |                           |                        |                       |                       |                           |            |            |             |                 |            |            |             |                     |            |            |             |
| Communication (5.5)       | 0.4 (±0.6)                               | 1.4 (±1.0)                                                                                                                                                                                                                                  | 1.0* (±1.2)                                                                                                                                                                                                                                                                                                                                                                                                                                                                                                                                                                                                                                                                                                                                                                                                                                                                                                                                            |  |  |  |                        |                        |                       |                       |               |            |                        |                       |                           |                        |                       |                       |                           |            |            |             |                 |            |            |             |                     |            |            |             |
| Varnell et al.            | 1. Attitudes<br>2. Implementation of EBP | 1. Evidence-based practice beliefs (EBPB) scale: 16 items (range 16 to 80)<br><br>2. Evidence-based practice implementation (EBPI) scale. 18-item Likert-type scale; Responses range from “0” (zero times) to “4” (>8 times). Range 0 to 72 | <p data-bbox="570 1148 781 1171">1. Scores of EBPB scale</p> <table border="1" data-bbox="570 1188 1555 1287"> <thead> <tr> <th>Before test means (SD)</th> <th>After test means (SD)</th> <th>p-value</th> </tr> </thead> <tbody> <tr> <td>57.10 (±5.73)</td> <td>63.73 (±4.50)</td> <td>&lt;0.01</td> </tr> </tbody> </table> <p data-bbox="570 1335 776 1358">2. Scores of EBPI Scale</p> <table border="1" data-bbox="570 1375 1555 1474"> <thead> <tr> <th>Before test means (SD)</th> <th>After test means (SD)</th> <th>p-value</th> </tr> </thead> <tbody> <tr> <td>15.29 (±13.65)</td> <td>22.86 (±11.35)</td> <td>&lt;0.01</td> </tr> </tbody> </table>                                                                                                                                                                                                                                                                                      |  |  |  | Before test means (SD) | After test means (SD)  | p-value               | 57.10 (±5.73)         | 63.73 (±4.50) | <0.01      | Before test means (SD) | After test means (SD) | p-value                   | 15.29 (±13.65)         | 22.86 (±11.35)        | <0.01                 |                           |            |            |             |                 |            |            |             |                     |            |            |             |
| Before test means (SD)    | After test means (SD)                    | p-value                                                                                                                                                                                                                                     |                                                                                                                                                                                                                                                                                                                                                                                                                                                                                                                                                                                                                                                                                                                                                                                                                                                                                                                                                        |  |  |  |                        |                        |                       |                       |               |            |                        |                       |                           |                        |                       |                       |                           |            |            |             |                 |            |            |             |                     |            |            |             |
| 57.10 (±5.73)             | 63.73 (±4.50)                            | <0.01                                                                                                                                                                                                                                       |                                                                                                                                                                                                                                                                                                                                                                                                                                                                                                                                                                                                                                                                                                                                                                                                                                                                                                                                                        |  |  |  |                        |                        |                       |                       |               |            |                        |                       |                           |                        |                       |                       |                           |            |            |             |                 |            |            |             |                     |            |            |             |
| Before test means (SD)    | After test means (SD)                    | p-value                                                                                                                                                                                                                                     |                                                                                                                                                                                                                                                                                                                                                                                                                                                                                                                                                                                                                                                                                                                                                                                                                                                                                                                                                        |  |  |  |                        |                        |                       |                       |               |            |                        |                       |                           |                        |                       |                       |                           |            |            |             |                 |            |            |             |                     |            |            |             |
| 15.29 (±13.65)            | 22.86 (±11.35)                           | <0.01                                                                                                                                                                                                                                       |                                                                                                                                                                                                                                                                                                                                                                                                                                                                                                                                                                                                                                                                                                                                                                                                                                                                                                                                                        |  |  |  |                        |                        |                       |                       |               |            |                        |                       |                           |                        |                       |                       |                           |            |            |             |                 |            |            |             |                     |            |            |             |

|             |                                                          |                                                                                                                                                                                                                           |                                                 |                               |                 |              |         |
|-------------|----------------------------------------------------------|---------------------------------------------------------------------------------------------------------------------------------------------------------------------------------------------------------------------------|-------------------------------------------------|-------------------------------|-----------------|--------------|---------|
| Yost et al. | 1. Knowledge<br>2. Skills<br>3. Implementation/behaviour | 1. and 2. Multiple-choice test (18 items, range 0 to 36)<br><br>3. Evidence-based practice implementation (EBPI) scale. 18-item Likert-type scale; Responses range from “0” (zero times) to “4” (>8 times). Range 0 to 72 | 1. and 2. Total scores for knowledge and skills |                               |                 |              |         |
|             |                                                          |                                                                                                                                                                                                                           | Before test means (SD)                          | After test means (SD)         | Mean difference | 95% CI       | p-value |
|             |                                                          |                                                                                                                                                                                                                           | 9.5 (±3.4)                                      | 15.1 (±5.2)                   | 5.6             | 3.7 to 7.4   | <0.001  |
|             |                                                          |                                                                                                                                                                                                                           | After test means (SD)                           | 6-month follow-up             | Mean difference | 95% CI       | p-value |
|             |                                                          |                                                                                                                                                                                                                           | 15.1 (±5.2)                                     | 13.2 (±5.1)                   | -1.9            | -3.7 to -0.3 | 0.018   |
|             |                                                          |                                                                                                                                                                                                                           | Before test means (SD)                          | 6-month follow-up             | Mean difference | 95% CI       | p-value |
|             |                                                          |                                                                                                                                                                                                                           | 9.5 (±3.4)                                      | 13.2 (±5.1)                   | 3.7             | 2.1 to 5.3   | <0.001  |
|             |                                                          |                                                                                                                                                                                                                           | 3. Total scores for EBPI scale                  |                               |                 |              |         |
|             |                                                          |                                                                                                                                                                                                                           | Before test means (SD)                          | 6-month follow-up             | Mean difference | 95% CI       | p-value |
|             |                                                          |                                                                                                                                                                                                                           | 14.5 (±11.9)                                    | 16.2 (±11.3)                  | 1.7             | -3.8 to 0.3  | 0.095   |
| Chen et al. | Skills                                                   | Critique test including 45 criteria (range 0 – 45 points)                                                                                                                                                                 | Critique Pre-test (mean, SD)                    | Critique Post-test (mean, SD) | p-value         |              |         |
|             |                                                          |                                                                                                                                                                                                                           | Intervention Group (n=94)                       | 5.11 ±3.00                    | 11.32 ±5.13     | <0.0001      |         |
|             |                                                          |                                                                                                                                                                                                                           | Control Group (n=74)                            | 4.39 ±2.59                    | 6.59 ±3.89      | <0.0001      |         |

| Courey et al.        | Attitudes           | 4-point Likert-Scale, scores ranging from 4 (agree) to 1 (disagree)                                                      | <p>Mean score for attitudes</p> <table border="1" data-bbox="573 684 1463 831"> <thead> <tr> <th></th> <th>Pre-test (mean, SD)</th> <th>Post-test (mean, SD)</th> </tr> </thead> <tbody> <tr> <td>Intervention Group *</td> <td>3.43 ±0.39</td> <td>2.82 ±0.83</td> </tr> <tr> <td>Control Group</td> <td>3.54 ±0.39</td> <td>3.47 ±0.50</td> </tr> </tbody> </table> <p>* Decrease in positive attitude from pre- to post-test (Wilks' Lambda F=20.140; df=1.58; p&lt;0.0001)</p>                                                                                                 |                                         |                                    |           |  | Pre-test (mean, SD) | Post-test (mean, SD) | Intervention Group * | 3.43 ±0.39 | 2.82 ±0.83 | Control Group | 3.54 ±0.39 | 3.47 ±0.50 |
|----------------------|---------------------|--------------------------------------------------------------------------------------------------------------------------|------------------------------------------------------------------------------------------------------------------------------------------------------------------------------------------------------------------------------------------------------------------------------------------------------------------------------------------------------------------------------------------------------------------------------------------------------------------------------------------------------------------------------------------------------------------------------------|-----------------------------------------|------------------------------------|-----------|--|---------------------|----------------------|----------------------|------------|------------|---------------|------------|------------|
|                      | Pre-test (mean, SD) | Post-test (mean, SD)                                                                                                     |                                                                                                                                                                                                                                                                                                                                                                                                                                                                                                                                                                                    |                                         |                                    |           |  |                     |                      |                      |            |            |               |            |            |
| Intervention Group * | 3.43 ±0.39          | 2.82 ±0.83                                                                                                               |                                                                                                                                                                                                                                                                                                                                                                                                                                                                                                                                                                                    |                                         |                                    |           |  |                     |                      |                      |            |            |               |            |            |
| Control Group        | 3.54 ±0.39          | 3.47 ±0.50                                                                                                               |                                                                                                                                                                                                                                                                                                                                                                                                                                                                                                                                                                                    |                                         |                                    |           |  |                     |                      |                      |            |            |               |            |            |
| Jalali-Nia et al.    | Attitudes           | 4-point Likert-scale, 21 questions, scores ranging from 4 (totally agree) to 1 (totally disagree)                        |                                                                                                                                                                                                                                                                                                                                                                                                                                                                                                                                                                                    | Intervention group<br>mean (SD), n = 20 | Control group<br>mean (SD), n = 21 | p-value   |  |                     |                      |                      |            |            |               |            |            |
|                      |                     |                                                                                                                          | Attitude                                                                                                                                                                                                                                                                                                                                                                                                                                                                                                                                                                           | 78.14 (9.1)                             | 59.95 (6.1)                        | p < 0.001 |  |                     |                      |                      |            |            |               |            |            |
| Stevenson et al.     | Attitudes           | 1. Agreement with 7 statements. Scores were based on a 3-point Likert-scale: agree; neither agree nor disagree; disagree | <p>The results demonstrated changes in attitudes towards some elements of the EBP concept following the intervention package including increased preference towards trust training programs for EBP and increased support given from management to undertake EBP. The size of the effect was small, partly reflecting the fact that at baseline this group already viewed EBP in a positive light. However, putting the concept into practice through research and literature searching was given a low priority by the physiotherapists.*</p> <p>*No further details reported</p> |                                         |                                    |           |  |                     |                      |                      |            |            |               |            |            |

| Levin et al.       | 1. Attitudes<br>2. Implementation of EBP                           | 1. 16-item EBP belief scale (5-point Likert-scale, range 16 to 80) higher scores indicating stronger beliefs about EBP<br><br>2. Evidence-based practice implementation (EBPI) scale. 18-item Likert-type scale; Responses range from "0" (zero times) to "4" (>8 times). Range 0 to 72 | <p>1. Main effect for group (<math>F_{1,15} = 33.105, p &lt; 0.001</math>), a quadratic main effect of time (<math>F_{1,15} = 7.335, p &lt; 0.016</math>) and a significant interaction between group and time (<math>F_{3,45} = 16.342, p = 0.001</math>)</p> <p>2. Overall score of the intervention group (<math>M = 29.52</math>) on the EBPI scale was significantly higher than that of the control group (<math>M = 10.44</math>)</p> <table border="1" data-bbox="570 856 1542 1052"> <thead> <tr> <th></th> <th>Intervention group</th> <th>Control group</th> <th></th> </tr> </thead> <tbody> <tr> <td>Baseline</td> <td>15.40</td> <td>10.53</td> <td></td> </tr> <tr> <td>4-month follow up</td> <td>41.46*</td> <td>14.83*</td> <td></td> </tr> <tr> <td>13-month follow up</td> <td>31.64*</td> <td>6.17*</td> <td></td> </tr> </tbody> </table> <p>* Significant at 0.05</p> |  |                                            |                                       |         | Intervention group | Control group           |                           | Baseline | 15.40         | 10.53                       |                            | 4-month follow up | 41.46* | 14.83* |  | 13-month follow up | 31.64* | 6.17* |  |
|--------------------|--------------------------------------------------------------------|-----------------------------------------------------------------------------------------------------------------------------------------------------------------------------------------------------------------------------------------------------------------------------------------|----------------------------------------------------------------------------------------------------------------------------------------------------------------------------------------------------------------------------------------------------------------------------------------------------------------------------------------------------------------------------------------------------------------------------------------------------------------------------------------------------------------------------------------------------------------------------------------------------------------------------------------------------------------------------------------------------------------------------------------------------------------------------------------------------------------------------------------------------------------------------------------------|--|--------------------------------------------|---------------------------------------|---------|--------------------|-------------------------|---------------------------|----------|---------------|-----------------------------|----------------------------|-------------------|--------|--------|--|--------------------|--------|-------|--|
|                    | Intervention group                                                 | Control group                                                                                                                                                                                                                                                                           |                                                                                                                                                                                                                                                                                                                                                                                                                                                                                                                                                                                                                                                                                                                                                                                                                                                                                              |  |                                            |                                       |         |                    |                         |                           |          |               |                             |                            |                   |        |        |  |                    |        |       |  |
| Baseline           | 15.40                                                              | 10.53                                                                                                                                                                                                                                                                                   |                                                                                                                                                                                                                                                                                                                                                                                                                                                                                                                                                                                                                                                                                                                                                                                                                                                                                              |  |                                            |                                       |         |                    |                         |                           |          |               |                             |                            |                   |        |        |  |                    |        |       |  |
| 4-month follow up  | 41.46*                                                             | 14.83*                                                                                                                                                                                                                                                                                  |                                                                                                                                                                                                                                                                                                                                                                                                                                                                                                                                                                                                                                                                                                                                                                                                                                                                                              |  |                                            |                                       |         |                    |                         |                           |          |               |                             |                            |                   |        |        |  |                    |        |       |  |
| 13-month follow up | 31.64*                                                             | 6.17*                                                                                                                                                                                                                                                                                   |                                                                                                                                                                                                                                                                                                                                                                                                                                                                                                                                                                                                                                                                                                                                                                                                                                                                                              |  |                                            |                                       |         |                    |                         |                           |          |               |                             |                            |                   |        |        |  |                    |        |       |  |
| Dizon et al.       | 1. Knowledge/Skills<br>2. Attitudes<br>3. Implementation/behaviour | 1. Adapted Fresno Test (AFT)                                                                                                                                                                                                                                                            | <p>AFT scores (total = 0-156)</p> <table border="1" data-bbox="570 1150 1542 1434"> <thead> <tr> <th></th> <th>Intervention group<br/>Median (IQR), 95% CI</th> <th>Control group<br/>Median (IQR), 95% CI</th> <th>p-value</th> </tr> </thead> <tbody> <tr> <td>Pre training</td> <td>11.0 (8.0-32.5), 9.0-21</td> <td>21.0 (5.0-29.5), 7.9-26.1</td> <td>0.97</td> </tr> <tr> <td>Post training</td> <td>68.0 (51.5-76.8), 53.0-72.0</td> <td>20.0 (9.3-30.8), 11.0-30.0</td> <td>&lt;0.0001*</td> </tr> </tbody> </table>                                                                                                                                                                                                                                                                                                                                                                 |  | Intervention group<br>Median (IQR), 95% CI | Control group<br>Median (IQR), 95% CI | p-value | Pre training       | 11.0 (8.0-32.5), 9.0-21 | 21.0 (5.0-29.5), 7.9-26.1 | 0.97     | Post training | 68.0 (51.5-76.8), 53.0-72.0 | 20.0 (9.3-30.8), 11.0-30.0 | <0.0001*          |        |        |  |                    |        |       |  |
|                    | Intervention group<br>Median (IQR), 95% CI                         | Control group<br>Median (IQR), 95% CI                                                                                                                                                                                                                                                   | p-value                                                                                                                                                                                                                                                                                                                                                                                                                                                                                                                                                                                                                                                                                                                                                                                                                                                                                      |  |                                            |                                       |         |                    |                         |                           |          |               |                             |                            |                   |        |        |  |                    |        |       |  |
| Pre training       | 11.0 (8.0-32.5), 9.0-21                                            | 21.0 (5.0-29.5), 7.9-26.1                                                                                                                                                                                                                                                               | 0.97                                                                                                                                                                                                                                                                                                                                                                                                                                                                                                                                                                                                                                                                                                                                                                                                                                                                                         |  |                                            |                                       |         |                    |                         |                           |          |               |                             |                            |                   |        |        |  |                    |        |       |  |
| Post training      | 68.0 (51.5-76.8), 53.0-72.0                                        | 20.0 (9.3-30.8), 11.0-30.0                                                                                                                                                                                                                                                              | <0.0001*                                                                                                                                                                                                                                                                                                                                                                                                                                                                                                                                                                                                                                                                                                                                                                                                                                                                                     |  |                                            |                                       |         |                    |                         |                           |          |               |                             |                            |                   |        |        |  |                    |        |       |  |



|                                                    |                              | <p>2. Six Questions related to changing practice and confidence in searching literature or undertaking critical appraisal. Questions are to be answered with agree, disagree or neither</p> <p>3. Measured by activity diaries. Participants of both groups were instructed to log EbM related activities in their working environment. A distinction was made for unique cases and usual cases</p> | <p>3-month post training</p>                                                                                                                                                                                                                                                                                                                                                                                                                                                                                                                                                                                                                                                                                                                                                                                                                                                                                                                                                                                                                                                                                                                                                                                                                                                                                                                                                                           | <p>53.0 (39.2-71.8), 42.0-69.1</p> | <p>9.0 (8.0-27.5), 9.0-15.2</p> | <p>&lt;0.0001*</p> |  |                              |                         |         |                                                    |  |  |  |                                  |            |        |         |                              |           |        |        |                                             |            |         |       |                                     |           |        |        |
|----------------------------------------------------|------------------------------|-----------------------------------------------------------------------------------------------------------------------------------------------------------------------------------------------------------------------------------------------------------------------------------------------------------------------------------------------------------------------------------------------------|--------------------------------------------------------------------------------------------------------------------------------------------------------------------------------------------------------------------------------------------------------------------------------------------------------------------------------------------------------------------------------------------------------------------------------------------------------------------------------------------------------------------------------------------------------------------------------------------------------------------------------------------------------------------------------------------------------------------------------------------------------------------------------------------------------------------------------------------------------------------------------------------------------------------------------------------------------------------------------------------------------------------------------------------------------------------------------------------------------------------------------------------------------------------------------------------------------------------------------------------------------------------------------------------------------------------------------------------------------------------------------------------------------|------------------------------------|---------------------------------|--------------------|--|------------------------------|-------------------------|---------|----------------------------------------------------|--|--|--|----------------------------------|------------|--------|---------|------------------------------|-----------|--------|--------|---------------------------------------------|------------|---------|-------|-------------------------------------|-----------|--------|--------|
|                                                    |                              |                                                                                                                                                                                                                                                                                                                                                                                                     | <p>* Significant at 0.05</p> <p>Significant difference were found between the groups immediate post-training and three month post-training in terms of two EbM activities:</p> <p>More participants in the intervention group disagreed in terms of “lacking confidence in undertaking a literature search” and more participants in the intervention group agreed in terms of “confidence in undertaking critical appraisal”</p> <p>No significant differences were found between the groups in terms of the remaining four EbM activities, specifically at three month post-training.</p> <p>Comparison of behaviour performed by the participants when faced with new or unique cases:</p>                                                                                                                                                                                                                                                                                                                                                                                                                                                                                                                                                                                                                                                                                                          |                                    |                                 |                    |  |                              |                         |         |                                                    |  |  |  |                                  |            |        |         |                              |           |        |        |                                             |            |         |       |                                     |           |        |        |
|                                                    |                              |                                                                                                                                                                                                                                                                                                                                                                                                     | <table border="1"> <thead> <tr> <th data-bbox="565 1104 1036 1199"></th> <th data-bbox="1036 1104 1268 1199">Intervention group<br/>n = 14</th> <th data-bbox="1268 1104 1461 1199">Control group<br/>n = 10</th> <th data-bbox="1461 1104 1557 1199">P value</th> </tr> </thead> <tbody> <tr> <td colspan="4" data-bbox="565 1199 1557 1255">EbM behaviours when faced with new or unique cases</td> </tr> <tr> <td data-bbox="565 1255 1036 1312">Participants who formulated PICO</td> <td data-bbox="1036 1255 1268 1312">11 (78,6%)</td> <td data-bbox="1268 1255 1461 1312">0 (0%)</td> <td data-bbox="1461 1255 1557 1312">0.0001*</td> </tr> <tr> <td data-bbox="565 1312 1036 1369">Participants who logged PICO</td> <td data-bbox="1036 1312 1268 1369">4 (28,6%)</td> <td data-bbox="1268 1312 1461 1369">0 (0%)</td> <td data-bbox="1461 1312 1557 1369">0.037*</td> </tr> <tr> <td data-bbox="565 1369 1036 1425">Participants who searched research evidence</td> <td data-bbox="1036 1369 1268 1425">10 (71,4%)</td> <td data-bbox="1268 1369 1461 1425">3 (30%)</td> <td data-bbox="1461 1369 1557 1425">0.04*</td> </tr> <tr> <td data-bbox="565 1425 1036 1482">Participants who appraised evidence</td> <td data-bbox="1036 1425 1268 1482">4 (28,6%)</td> <td data-bbox="1268 1425 1461 1482">0 (0%)</td> <td data-bbox="1461 1425 1557 1482">0.037*</td> </tr> </tbody> </table> |                                    |                                 |                    |  | Intervention group<br>n = 14 | Control group<br>n = 10 | P value | EbM behaviours when faced with new or unique cases |  |  |  | Participants who formulated PICO | 11 (78,6%) | 0 (0%) | 0.0001* | Participants who logged PICO | 4 (28,6%) | 0 (0%) | 0.037* | Participants who searched research evidence | 10 (71,4%) | 3 (30%) | 0.04* | Participants who appraised evidence | 4 (28,6%) | 0 (0%) | 0.037* |
|                                                    | Intervention group<br>n = 14 | Control group<br>n = 10                                                                                                                                                                                                                                                                                                                                                                             | P value                                                                                                                                                                                                                                                                                                                                                                                                                                                                                                                                                                                                                                                                                                                                                                                                                                                                                                                                                                                                                                                                                                                                                                                                                                                                                                                                                                                                |                                    |                                 |                    |  |                              |                         |         |                                                    |  |  |  |                                  |            |        |         |                              |           |        |        |                                             |            |         |       |                                     |           |        |        |
| EbM behaviours when faced with new or unique cases |                              |                                                                                                                                                                                                                                                                                                                                                                                                     |                                                                                                                                                                                                                                                                                                                                                                                                                                                                                                                                                                                                                                                                                                                                                                                                                                                                                                                                                                                                                                                                                                                                                                                                                                                                                                                                                                                                        |                                    |                                 |                    |  |                              |                         |         |                                                    |  |  |  |                                  |            |        |         |                              |           |        |        |                                             |            |         |       |                                     |           |        |        |
| Participants who formulated PICO                   | 11 (78,6%)                   | 0 (0%)                                                                                                                                                                                                                                                                                                                                                                                              | 0.0001*                                                                                                                                                                                                                                                                                                                                                                                                                                                                                                                                                                                                                                                                                                                                                                                                                                                                                                                                                                                                                                                                                                                                                                                                                                                                                                                                                                                                |                                    |                                 |                    |  |                              |                         |         |                                                    |  |  |  |                                  |            |        |         |                              |           |        |        |                                             |            |         |       |                                     |           |        |        |
| Participants who logged PICO                       | 4 (28,6%)                    | 0 (0%)                                                                                                                                                                                                                                                                                                                                                                                              | 0.037*                                                                                                                                                                                                                                                                                                                                                                                                                                                                                                                                                                                                                                                                                                                                                                                                                                                                                                                                                                                                                                                                                                                                                                                                                                                                                                                                                                                                 |                                    |                                 |                    |  |                              |                         |         |                                                    |  |  |  |                                  |            |        |         |                              |           |        |        |                                             |            |         |       |                                     |           |        |        |
| Participants who searched research evidence        | 10 (71,4%)                   | 3 (30%)                                                                                                                                                                                                                                                                                                                                                                                             | 0.04*                                                                                                                                                                                                                                                                                                                                                                                                                                                                                                                                                                                                                                                                                                                                                                                                                                                                                                                                                                                                                                                                                                                                                                                                                                                                                                                                                                                                  |                                    |                                 |                    |  |                              |                         |         |                                                    |  |  |  |                                  |            |        |         |                              |           |        |        |                                             |            |         |       |                                     |           |        |        |
| Participants who appraised evidence                | 4 (28,6%)                    | 0 (0%)                                                                                                                                                                                                                                                                                                                                                                                              | 0.037*                                                                                                                                                                                                                                                                                                                                                                                                                                                                                                                                                                                                                                                                                                                                                                                                                                                                                                                                                                                                                                                                                                                                                                                                                                                                                                                                                                                                 |                                    |                                 |                    |  |                              |                         |         |                                                    |  |  |  |                                  |            |        |         |                              |           |        |        |                                             |            |         |       |                                     |           |        |        |

|  |  |  |                                                                                    |                             |                         |         |
|--|--|--|------------------------------------------------------------------------------------|-----------------------------|-------------------------|---------|
|  |  |  | Participants who applied evidence                                                  | 4 (28,6%)                   | 0 (0%)                  | 0.037*  |
|  |  |  | <b>Non- EbM behaviours when faced with new or unique cases</b>                     |                             |                         |         |
|  |  |  | Participants who asked colleagues                                                  | 11 (78,6%)                  | 8 (80%)                 | 0.93    |
|  |  |  | Participants who asked MD                                                          | 6 (42.9%)                   | 10 (100%)               | 0.003*  |
|  |  |  | Participants who read textbooks                                                    | 8 (57.1%)                   | 10 (100%)               | 0.017*  |
|  |  |  | * Significant at 0,05                                                              |                             |                         |         |
|  |  |  | Comparison of behaviour performed by the participants when faced with usual cases: |                             |                         |         |
|  |  |  |                                                                                    | Intervention group<br>N = 9 | Control group<br>N = 10 | p-value |
|  |  |  | <b>EbM behaviours when faced with usual cases</b>                                  |                             |                         |         |
|  |  |  | Participants who formulated PICO                                                   | 8 (88,9%)                   | 0 (0%)                  | <0.001  |
|  |  |  | Participants who logged PICO                                                       | 2 (22,2%)                   | 0 (0%)                  | 0.16    |
|  |  |  | Participants who searched research evidence                                        | 9 (100%)                    | 3 (30%)                 | 0.0016* |
|  |  |  | Participants who appraised evidence                                                | 3 (33.3%)                   | 0 (0%)                  | 0.04*   |
|  |  |  | Participants who applied evidence                                                  | 4 (44.4%)                   | 0 (0%)                  | 0.018*  |

|  |  |  |                                                |           |         |       |
|--|--|--|------------------------------------------------|-----------|---------|-------|
|  |  |  | Non-EbM behaviours when faced with usual cases |           |         |       |
|  |  |  | Participants who asked colleagues              | 7 (77.8%) | 8 (80%) | 0.906 |
|  |  |  | Participants who asked MD                      | 4 (44.4%) | 7 (70%) | 0.26  |
|  |  |  | Participants who read textbooks                | 7 (77.8%) | 7 (70%) | 0.70  |
|  |  |  | * Significant at 0.05                          |           |         |       |
